# Supplementary material for: Differentiating Pigs from Wild Boars Based on NR6A1 and MC1R Gene Polymorphisms
Source: MDPI journal article supplement (doi:10.3390/ani11072123), 2021-07-17
Supplement: s1 [file s1]

Table 1. Thermal condition of PCR used in the study

| MC1R PCR      |       |        |        | MC1R sequencing PCR |        |        | NR6A1 real-time PCR |         |        |
|---------------|-------|--------|--------|---------------------|--------|--------|---------------------|---------|--------|
| Reaction step | Temp. | time   | cycles | temp                | time   | cycles | temp                | time    | cycles |
| Denaturation  | 95 °C | 15 min |        | 95                  | 10 min |        | 95°C                | 15 min. | 1x     |
| Annealing     | 94 °C | 45 sec | 35     | 96                  | 10 sec | 25     | 95°C                | 15 sec  | 45x    |
|               | 63 °C | 50sec  |        | 55                  | 4 min  |        | 60°C                | 1 min.  |        |
