# Supplementary material for: Differentiating Pigs from Wild Boars Based on NR6A1 and MC1R Gene Polymorphisms
Source: MDPI journal article supplement (doi:10.3390/ani11072123), 2021-07-17
Supplement: s1 [file s1]

Supplementary Figure 2. Pictures of the pig breeds studied.

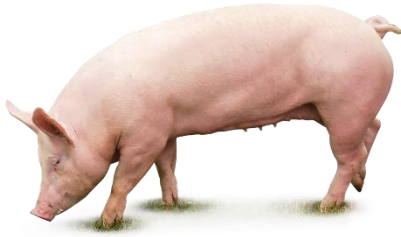

Polish Large White;  
<https://www.polsus.pl/index.php/en/pig-breeding/breeds/polish-large-white>

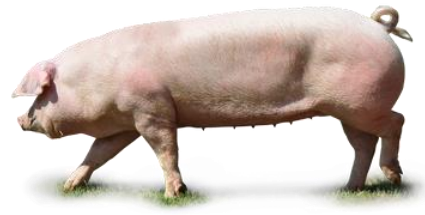

Polish Landrace;  
<https://www.polsus.pl/index.php/en/pig-breeding/breeds/polish-landrace>

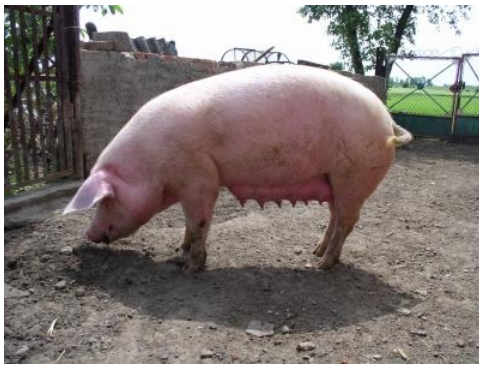

Żłotnicka White;  
<http://www.bioroznorodnosc.izoo.krakow.pl/swinie/biala>

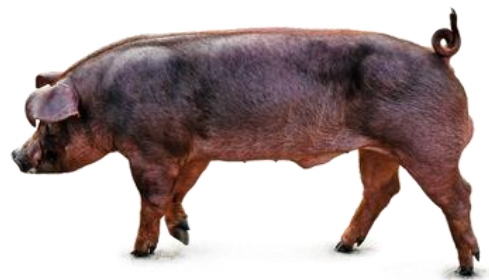

Duroc;  
<https://www.polsus.pl/index.php/en/pig-breeding/breeds/duroc>

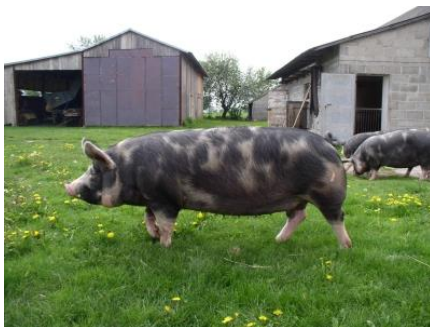

Puławska;  
<http://www.bioroznorodnosc.izoo.krakow.pl/swinie/pulawska>
