# Supplementary figures and images for: Differentiating Pigs from Wild Boars Based on NR6A1 and MC1R Gene Polymorphisms
Source: MDPI journal article supplement (doi:10.3390/ani11072123), 2021-07-17

Figure S1. Sampling locations.

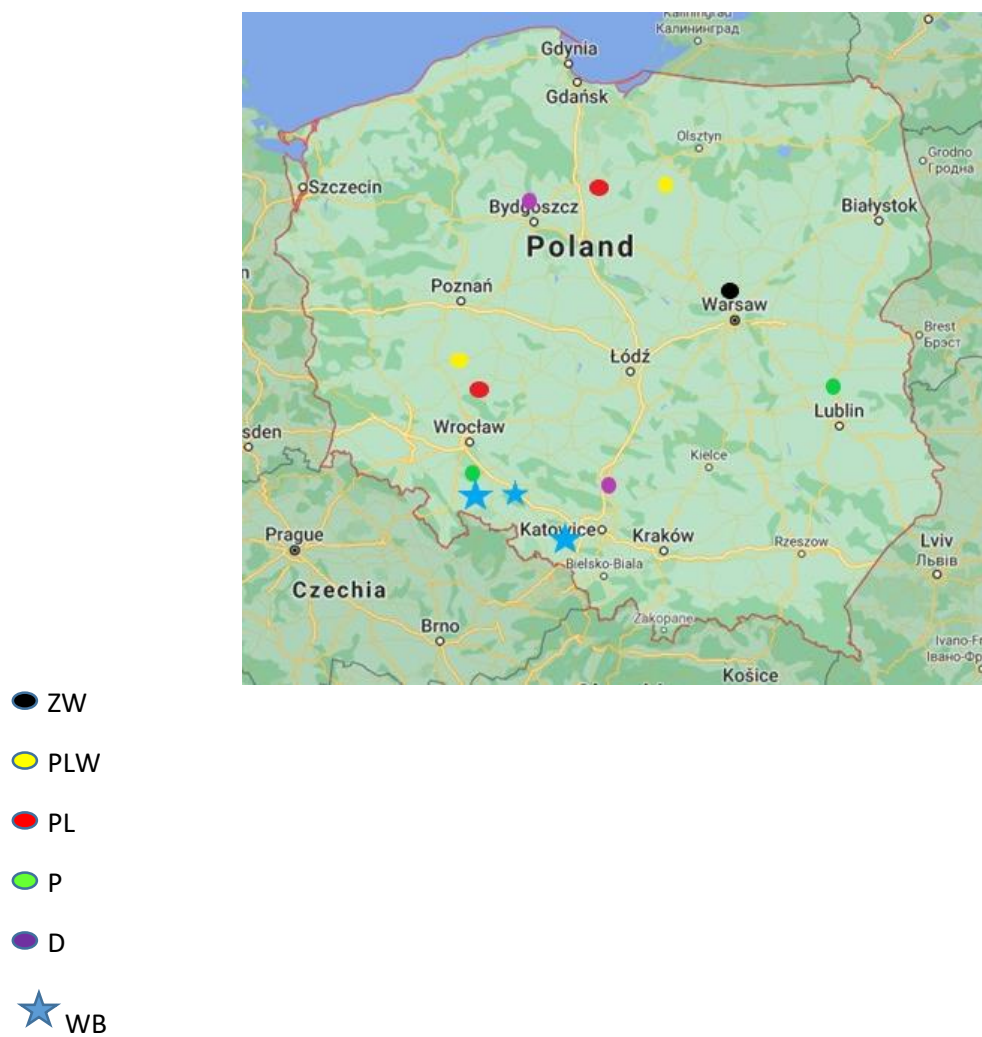

Supplement: s1 [file s1]
